# Supplementary material
Source: Springer Nature journal article supplement (https://www.springermedizin.de/resource/supplementary/12967_2011_855_MOESM3_ESM.pdf/9577198)

**HD PBMC****NPC PBMC****NPC TIL****Foxp3**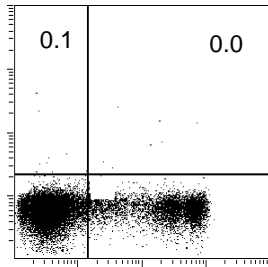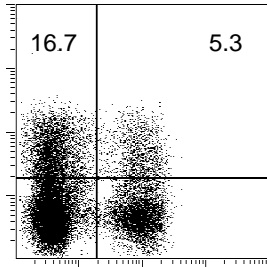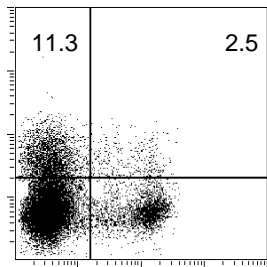**IL-17**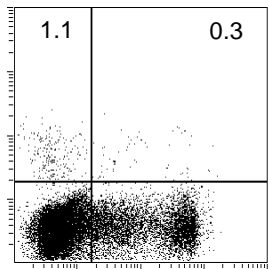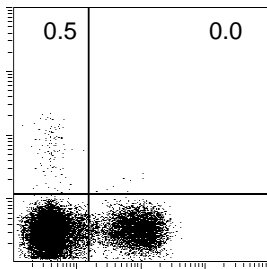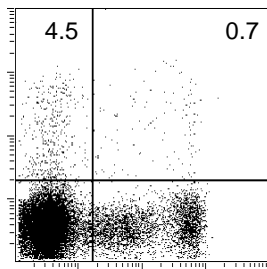**CD8**

Supplement: MOESM3 [file 9577198]
